1 **Monkeypox virus quadrivalent mRNA vaccine induces antibody**  
2 **responses and cellular immunity and protects mice against Vaccinia**  
3 **virus**

4 Ye Sang <sup>1,4</sup>, Zhen Zhang <sup>1,4</sup>, Fan Liu <sup>2,4</sup>, Haitao Lu <sup>1,4</sup>, Changxiao Yu <sup>1</sup>,  
5 Huisheng Sun <sup>1</sup>, Jinrong Long <sup>1</sup>, Yiming Cao <sup>1</sup>, Jierui Mai <sup>1</sup>, Xin Wang <sup>1</sup>, Jiaxin  
6 Fang <sup>1</sup>, Youchun Wang <sup>3</sup>, Weijin Huang <sup>2\*</sup>, Jing Yang <sup>1\*</sup> and Shengqi Wang <sup>1\*</sup>

7 <sup>1</sup> Beijing Institute of Microbiology and Epidemiology, Beijing 100850, PR.

8 China;

9 <sup>2</sup> Division of HIV/AIDS and Sex-transmitted Virus Vaccines, Institute for

10 Biological Product Control, National Institutes for Food and Drug Control

11 (NIFDC), Beijing 102629, PR. China;

12 <sup>3</sup> Institute of Medical Biology, Chinese Academy of Medical Sciences,

13 Kunming 650031, PR. China;

14 <sup>4</sup> These authors contributed equally: Ye Sang, Zhen Zhang, Fan Liu, Haitao

15 Lu.

16 Correspondence: Shengqi Wang ([sqwang@bmi.ac.cn](mailto:sqwang@bmi.ac.cn)) or Jing Yang

17 ([jingyang0511@sina.com](mailto:jingyang0511@sina.com)) or Weijin Huang ([huangweijin@nifdc.org.cn](mailto:huangweijin@nifdc.org.cn));

18 Beijing Institute of Microbiology and Epidemiology, 27 Taiping Road, Haidian

19 District, Beijing, 100850, PR. China; Tel: 01066932074

20

21 **Abstract:**

22 There is an urgent need for efficient and safe vaccines against the monkeypox  
23 virus (MPXV) in response to the rapidly spreading monkeypox epidemic. In  
24 the age of COVID-19, mRNA vaccines have been highly successful and  
25 emerged as platforms enabling rapid development and large-scale  
26 preparation. Here, we have developed two MPXV quadrivalent mRNA  
27 vaccines, named mRNA-A-LNP and mRNA-B-LNP, based on two IMVs (A29L  
28 and M1R) and two EEVs (A35R and B6R). By administering mRNA-A-LNP  
29 and mRNA-B-LNP intramuscularly twice, mice have induced MPXV-specific  
30 IgG antibodies and potent Vaccinia virus (VACV)-specific neutralizing  
31 antibodies. Additionally, it elicited durable MPXV-specific killer memory T-cell  
32 immunity as well as memory B-cell immunity in mice. Furthermore, the  
33 passive transfer of sera from mRNA-A-LNP and mRNA-B-LNP-immunized  
34 mice protected nude mice against the VACV challenge. In addition, two doses  
35 of mRNA-A-LNP and mRNA-B-LNP were also protective against the VACV  
36 challenge in mice. Overall, our results demonstrated that mRNA-A-LNP and  
37 mRNA-B-LNP appear to be safe and effective vaccine candidates against  
38 monkeypox epidemics, as well as against outbreaks caused by other  
39 orthopoxviruses, including the smallpox virus.

40

41 **Introduction:**

42 Monkeypox, caused by the monkeypox virus (MPXV), is a zoonotic viral  
43 disease. Since May 2022, there have been more than 78,000 confirmed  
44 MPXV cases and more than 40 deaths worldwide, and transmission has  
45 occurred in 110 countries. Monkeypox has been declared a public health  
46 emergency by the World Health Organization. According to phylogenetic  
47 analysis, MPXV can be divided into two distinct clades, Central Africa (also  
48 known as the Congo Basin) and West Africa, with a high degree of sequence  
49 similarity between the two clades.<sup>1</sup> Among them, The Central African clade  
50 tended to be more virulent, with a mean mortality rate of 10.6 % compared to  
51 3.6 % for the West African clade.<sup>2</sup> This may be because several open reading  
52 frames encoding immune evasion genes are disrupted in the West African  
53 clade, resulting in lower virulence in this clade.<sup>3</sup> Nevertheless, it is the West  
54 African clade that caused the cases that are circulating in this outbreak.<sup>4</sup>  
55 As a family of double-stranded DNA viruses, orthopoxviruses are composed  
56 of various viruses, including the Variola virus, Vaccinia virus (VACV), MPXV,  
57 and Cowpox virus.<sup>5</sup> Orthopoxvirus infection or immunization confers immunity  
58 against other viruses in the genus.<sup>6</sup> As a result, two vaccines have been  
59 approved by the FDA for the prevention of MPXV: ACAM2000, a second-  
60 generation live VACV vaccine, and JYNNEOS, an attenuated third-generation  
61 vaccine based on Modified Vaccinia Ankara (MVA). It has been reported that  
62 these two VACV-based smallpox vaccines are cross-protective against  
63 MPXV.<sup>7</sup> However, smallpox vaccination does not completely protect against

64 MPXV during the current outbreak, according to a recent study.<sup>8</sup> Additionally,  
65 ACAM2000 was a highly reproducing VACV vaccine that caused serious  
66 adverse events.<sup>9</sup> These events include autoinoculation of the eye, generalized  
67 vaccinia, eczema vaccinatum, progressive vaccinia, myocarditis, and death.<sup>10</sup>  
68 On the other hand, JYNNEOS, a replication-deficient vaccine, is expected to  
69 have the lowest incidence of severe adverse events.<sup>9</sup> However, as live virus  
70 vaccines, JYNNEOS and ACAM2000 have undefined immune targets, and  
71 the impact of their gene products on immunity and adverse reactions remains  
72 unclear. Therefore, it is imperative to develop a vaccine specifically for MPXV  
73 to ensure complete protection.

74 In this study, the MPXV quadrivalent mRNA vaccines, mRNA-A-LNP and  
75 mRNA-B-LNP, were prepared using A29L, A35R, M1R, and B6R as antigenic  
76 targets. Orthopoxviruses can infect cells through two different mechanisms  
77 depending on whether they are intracellular mature viruses (IMV) or  
78 extracellular enveloped viruses (EEV).<sup>11</sup> There are two IMV-specific proteins  
79 (A29L and M1R) in the quadrivalent mRNA vaccine, and two EEV-specific  
80 proteins (A35R and B6R). Among the orthologous homologous to VACV, the  
81 L1R and A27L are known neutralizing antibody targets for IMV; the B5R are  
82 known neutralizing antibody targets for EEV; however, the A33R is a target of  
83 complement-mediated cytolysis.<sup>12, 13</sup> The combination of IMV- and EEV-  
84 specific immunogens have been found to provide more protection than either  
85 immunogen alone.<sup>14</sup> It was reported that a DNA vaccine expressing A27L,

86 A33R, L1R and B5R provided protection against lethal monkeypox,<sup>12</sup>  
87 rabbitpox<sup>15</sup> and vaccinia<sup>16</sup> virus challenges. In contrast, vaccination with a  
88 single L1R provided a degree of protection against the lethal MPXV challenge  
89 but not against severe disease.<sup>12</sup>  
90 Since the outbreak of COVID-19, mRNA vaccines have received  
91 unprecedented attention. There is a better immune response and safety  
92 associated with mRNA vaccines than with live virus and DNA vaccines.<sup>17, 18</sup>  
93 Furthermore, as opposed to multiple punctures (scarification) percutaneous  
94 administration of live VACV vaccines<sup>6</sup> and electroporation of DNA vaccines<sup>15</sup>,  
95 intramuscular administration of mRNA vaccines has reduced healthcare  
96 worker training and healthcare costs. So far, successful mRNA immunization  
97 resulting in protection from orthopoxviruses has never been reported. Here,  
98 we targeted MPXV homologs rather than VACV as antigenic targets to  
99 prepare MPXV quadrivalent mRNA vaccine, which induced MPXV-specific  
100 IMV- and EEV-antigen-specific IgG and potent VACV live-virus neutralizing  
101 antibodies. Meanwhile, immunized mice elicited a durable cellular response.  
102 Furthermore, mRNA-A-LNP and mRNA-B-LNP protected mice from VACV  
103 challenge.

104

## 105 **Results:**

### 106 ***In vitro* characterization of mRNA-A-LNP and mRNA-B-LNP**

107 In this study, we developed potent MPXV quadrivalent mRNA vaccines that  
108 target two IMV-antigens and two EEV-antigens. Here, A29L, A35R, M1R and  
109 B6R, respectively, were chosen as antigenic targets for the mRNA coding  
110 sequences (Fig. 1a). The modified mRNA molecule begins with a 5'-cap 1,  
111 adheres to the 5'- and 3'-untranslated regions (UTRs), and then ends with a  
112 Poly-A tail. First, based on different mRNA design platforms, we constructed  
113 two groups of mRNA sequences, mRNA-A-mix and mRNA-B-mix. All mRNAs  
114 have been authenticated by capillary electrophoresis using the Agilent 2100  
115 Bioanalyzer System (Supplementary information, Fig. S1). Based on Western  
116 blot analysis, both mRNA-mix detected bands at positions corresponding to  
117 each of the four antigenic proteins. It indicated that both mRNA-A-mix and  
118 mRNA-B-mix could successfully express the proteins (Fig. 1b). Afterwards,  
119 the mixed mRNAs were processed into LNP formulations. The resulting two  
120 quadrivalent mRNA vaccines were named mRNA-A-LNP and mRNA-B-LNP,  
121 respectively (Fig. 1c). The final stored mRNA-A-LNP and mRNA-B-LNP  
122 showed average particle sizes of 98.16 nm and 89.11 nm, respectively, and  
123 potentials of 5.3 mV and 6.9 mV. Meanwhile, over 90% of encapsulation rates  
124 were achieved by both (Fig. 1d). The cryo-transmission electron microscopy  
125 (TEM) analysis also revealed that both mRNA-A-LNP and mRNA-B-LNP  
126 particles exhibited a homogeneous solid spherical morphology, which  
127 indicated that the morphology of the LNPs loaded with the four mRNAs  
128 remained stable (Fig. 1e). According to these results, mRNA-A-LNP and

129 mRNA-B-LNP can efficiently express MPXV proteins A29L, A35R, M1R, and  
130 B6R *in vitro*.

131 **The prophylactic administration of mRNA-A-LNP and mRNA-B-LNP**  
132 **induces potent humoral immunity in mice**

133 The immunogenicity and efficacy of mRNA-A-LNP and mRNA-B-LNP were  
134 also assessed in mice. Initially, female BALB/c mice were divided into three  
135 groups (n = 5) and immunized at intervals of 14 days (Fig. 2a). The mice were  
136 immunized with 40 µg of mRNA-A-LNP or mRNA-B-LNP, respectively, by  
137 twice intramuscular administration; naive mice served as the control group.  
138 Then, sera were collected from all mice 10 and 24 days after their first  
139 immunization to assess humoral immunity. Furthermore, no local skin  
140 reactions or inflammation were observed at the injection site. This suggests,  
141 unlike ACAM2000 (the damage at the vaccine site is often used as a marker  
142 of successful vaccination in highly replicating vaccines like ACAM2000), our  
143 vaccine does not undergo a significant cutaneous reaction, also known as  
144 "take", which means no risks of autoinoculation or accidental vaccination.<sup>6</sup>  
145 The binding antibody responses against MPXV antigens (A29L, A35R, M1R  
146 and B6R) were assessed by enzyme-linked immunosorbent assay (ELISA) 10  
147 and 24 days after vaccination. Antibodies against all four target antigens were  
148 detected in all vaccinated mice and increased significantly over immunization  
149 frequency. The IgG titers against the four MPXV antigens at day 24 were  
150 48,000 (A29L), 1,080,000 (A35R), 4,040,000 (M1R), 900,000 (B6R) for

151 mRNA-A-LNP and 92,000 (A29L), 1,200,000 (A35R), 3,600,000 (M1R),  
152 600,000 (B6R) for mRNA-B-LNP, respectively (Fig. 2b-e). The results  
153 indicated that mRNA-A-LNP and mRNA-B-LNP induce robust IgG against  
154 MPXV antigens.  
155 The neutralizing antibody responses were assessed by live-virus  
156 neutralization tests using the VACV Tian Tan strain. After initial vaccination,  
157 neutralizing antibody titers were slightly above the detection limit, with median  
158 values of 73 and 49 for mRNA-A-LNP and mRNA-B-LNP, respectively (Fig.  
159 2f). After booster immunization, neutralizing antibody titers increased by  
160 nearly 2 log<sub>10</sub>, with median values of 6,284 and 5,057 for mRNA-A-LNP and  
161 mRNA-B-LNP, respectively (Fig. 2f). Based on the MPXV antigen-specific  
162 ELISA and VACV live-virus neutralization tests, there was no statistical  
163 difference in the humoral response to mRNA-A-LNP or mRNA-B-LNP  
164 immunizations. In conclusion, these results suggest that the quadrivalent  
165 mRNA vaccine induced neutralizing antibodies against VACV and IgG  
166 antibodies against MPXV.

167 **The mRNA-A-LNP and mRNA-B-LNP induce long-term cellular immunity**  
168 **in mice**

169 MPXV infection is primarily controlled by antibodies, but memory B cells and  
170 memory T cells play a role in the development of the humoral response to the  
171 monkeypox vaccine.<sup>19</sup> Here, through the measurement of MPXV-specific  
172 germinal center (GC) B cells, follicular helper T (T<sub>fh</sub>) cells, as well as CD4<sup>+</sup>



173 and CD8<sup>+</sup> effector memory T (Tem) cells, we assessed the ability of mRNA-A-  
174 LNP and mRNA-B-LNP to induce cellular immunity. The GC responses are  
175 responsible for generating high-affinity neutralizing antibodies,<sup>20</sup> while Tfh  
176 cells regulate the GC response.<sup>21, 22</sup> Furthermore, memory CD4<sup>+</sup> T cells and  
177 memory CD8<sup>+</sup> T cells may provide long-term protection. In our study, GC B  
178 cells (defined as Fas<sup>+</sup>/GL7<sup>+</sup> cells) and Tfh cells (defined as CXCR5<sup>+</sup>/PD-1<sup>+</sup>  
179 cells) were evaluated in draining lymph nodes (DLNs) by flow cytometry 30  
180 days after the first immunization. Flow cytometry results showed a significant  
181 increase in MPXV-specific GC B cells and Tfh cells from mRNA-A-LNP and  
182 mRNA-B-LNP-vaccinated mice compared with naive mice upon stimulation  
183 with MPXV-specific antigens (Fig. 3a-b). This suggests that mRNA-A-LNP and  
184 mRNA-B-LNP immunization can produce a long-lasting memory B cell effect.  
185 Then, specific CD4<sup>+</sup> and CD8<sup>+</sup> Tem cells (defined as CD44<sup>+</sup>/CD62L<sup>-</sup> cells) in  
186 the spleen of immunised mice were further assessed. It was remarkable that  
187 mRNA-A-LNP and mRNA-B-LNP were more effective in induced MPXV-  
188 specific CD8<sup>+</sup> Tem cells than CD4<sup>+</sup> Tem cells (Fig. 3c-d). This demonstrated  
189 that our vaccine caused a memory T cell effect with the ability to kill virus-  
190 infected cells.

### 191 **The mRNA-A-LNP and mRNA-B-LNP protected mice from VACV** 192 **challenge**

193 The VACV challenge model based on firefly luciferase expression<sup>23</sup> was used  
194 to assess the protection of mRNA-A-LNP and mRNA-B-LNP in mice. First, we

195 investigated the passive protection of mRNA-A-LNP and mRNA-B-LNP  
196 immunized mouse sera (NT<sub>50</sub>: 6,284; 5,057), with sera from naive mice  
197 serving as negative controls. Viral infection in passively transferred serum  
198 nude mice was detected by bioluminescence imaging (BLI).<sup>24</sup> At first, after 1 h  
199 of coincubation of serum with VACV *in vitro*, we observed a significant  
200 reduction in bioluminescent signal in 4-week-old nude mice injected with  
201 immunized mouse serum (Fig. 4a-b). It indicated that sera from mRNA-A-LNP  
202 and mRNA-B-LNP-immunized mice were effective in neutralizing VACV *in*  
203 *vitro*. In addition, the luminescence signal of 4-week-old nude mice was  
204 reduced by pre-injection of sera from immunized mice. Following the  
205 subcutaneous (s.c.) challenge 24 hours later, only a luminescence signal was  
206 detected at the injection site in nude mice passively immunized with mouse  
207 serum, indicating that the antibody had neutralized the virus (Fig. 4c-d). By  
208 contrast, significant viral infections were detected in nude mice passively  
209 transferred with serum from naive mice. These results demonstrated that  
210 mRNA-A-LNP and mRNA-B-LNP inoculated mouse sera had a passive  
211 protective efficacy against s.c. VACV challenge in immunodeficient young  
212 mice.

213 Furthermore, we assessed the active protective efficacy of mRNA-A-LNP and  
214 mRNA-B-LNP. BALB/c mice immunized twice intramuscularly with 10 µg of  
215 mRNA-A-LNP or mRNA-B-LNP were challenged at day 30 with  $4 \times 10^5$   
216 median tissue culture infectious doses (TCID<sub>50</sub>) of the VACV Tian Tan strain

217 via the s.c. route. Viral load was measured in mice at 24 hours following the  
218 challenge by using BLI. The bioluminescent signal was largely undetectable in  
219 immune mice, whereas naive mice detected signal values as high as 6.5  
220 log<sub>10</sub>, which suggested that VACV was rapidly cleared by vaccine-induced  
221 antibodies after the challenge (Fig. 4e-f). This suggests that prophylactic  
222 immunization with mRNA-A-LNP and mRNA-B-LNP is effective in protecting  
223 mice from s.c. VACV challenge.

224 **MPXV quadrivalent mRNA vaccine administered intramuscularly**  
225 **provides adequate safety**

226 To assess the safety of our vaccine *in vivo*, we monitored several aspects,  
227 including mouse weight recordings, biochemical parameters and  
228 histopathological changes. After mRNA-A-LNP or mRNA-B-LNP  
229 immunization, body weight rapidly recovered, and no weight loss occurred  
230 (Fig. 5a). Since mRNA-A-LNP was prepared using the same method as  
231 mRNA-B-LNP, it was selected for further investigation of whether mice were  
232 harmed by the MPXV quadrivalent mRNA vaccine. First, according to clinical  
233 trial data, VACV-based vaccines have caused adverse events, including a  
234 0.6% risk of myocarditis.<sup>6</sup> Therefore, we further assessed the heart, liver and  
235 kidney function based on blood biochemical parameters. The data were within  
236 normal limits in the immunised and control groups, and there were no  
237 significant differences (Fig. 5b-f). Finally, multiple tissues from the mice were  
238 extracted for histopathological examination. As a result, there were no

239 significant pathological changes between the immune and control groups (Fig.  
240 5g). In conclusion, multiple lines of evidence demonstrate that our vaccine  
241 presents an adequate safety profile.

242

#### 243 **Discussion:**

244 Since the use of live VACV in the past century, smallpox has been completely  
245 eradicated, associated vaccination no longer occurs, and vaccine production  
246 has ceased accordingly. In this study, we report the immunogenicity and  
247 efficacy of the novel MPXV mRNA vaccine candidate, mRNA-A-LNP and  
248 mRNA-B-LNP. Two doses of immunization with mRNA-A-LNP or mRNA-B-  
249 LNP, respectively, induced potent MPXV IgG and robust VACV-neutralizing  
250 antibodies, and elicited durable MPXV-specific memory cellular immunity in  
251 mice.

252 The subunit-based smallpox vaccines have shown exciting feasibility in  
253 previous studies. Both combinatorial DNA vaccines and protein vaccines  
254 containing poxvirus antigens generated protective antibody responses in small  
255 animals and non-human primate models.<sup>12, 15, 16, 25</sup> In our study, mRNA-A-LNP  
256 and mRNA-B-LNP vaccines produced high titers of IgG antibodies against the  
257 MPXV antigens A29L, A35R, M1R, and B6R (Fig. 2b-e). As MPXV A29L,  
258 A35R, M1R, and B6R genes exhibit high conservation with the orthologous  
259 genes of orthopoxviruses, including VACV and smallpox virus<sup>16</sup>, we speculate  
260 that mRNA-A-LNP and mRNA-B-LNP have cross-neutralizing effects on

261 orthopoxviruses. Interestingly, live-virus neutralizing antibody assays  
262 determined that our MPXV vaccine elicited potent VACV-neutralizing  
263 antibodies (Fig. 2f). This means that MPXV vaccines provide cross-  
264 neutralizing antibodies against VACV within orthopoxviruses. Furthermore,  
265 vaccine-induced humoral responses were confirmed in nude mice by passive  
266 transfer tests.<sup>26, 27</sup> It was observed that passive transfer of serum from  
267 vaccinated mice provides passive protection in nude mice against s.c. VACV  
268 challenge (Fig. 4a-d). This suggested that mRNA-A-LNP and mRNA-B-LNP-  
269 induced antibodies could provide protection in immunodeficient young mice.  
270 This is consistent with another study in which serum from DNA vaccinated  
271 animals were able to protect mice against a VACV challenge.<sup>26</sup> Furthermore,  
272 two doses of prophylactic immunization with mRNA-A-LNP and mRNA-B-LNP  
273 protected mice from s.c. VACV challenge (Fig. 4e-f).  
274 Using the mRNA vaccine platform, the MPXV quadrivalent mRNA vaccines,  
275 mRNA-A-LNP and mRNA-B-LNP, induced high titers of functional antibodies  
276 in mice while also boosting cellular immunity. The induction of cellular  
277 immunity may be a critical factor in explaining the remarkable protection  
278 provided by live attenuated vaccines compared with subunit vaccines.<sup>12, 28</sup> In  
279 the application of the SARS-CoV-2 vaccine, mRNA vaccines have been well  
280 demonstrated to induce cellular immunity.<sup>20, 29</sup> It is consistent with our findings  
281 that the MPXV quadrivalent mRNA vaccine was able to elicit excellent cellular  
282 immunity (Fig. 3a-d). In addition, live virus vaccines do not stop the virus from

283 spreading.<sup>30</sup> In contrast, the smallpox DNA vaccine, a nucleic acid vaccine,  
284 has been reported to prevent the shedding of infectious viruses in the oral  
285 cavity of vaccinated animals.<sup>31</sup> As a result, it is reasonable to hypothesize that  
286 the MPXV mRNA vaccine, also as a nucleic acid vaccine, will prevent the  
287 shedding of infectious viruses in all inoculated animals. And we will conduct  
288 further studies to test this hypothesis.

289 In the orthopoxvirus route of infection, monocytes are first recruited to the site  
290 of infection as the initial target.<sup>32, 33</sup> The cytolytic T cells, meanwhile, kill  
291 infected monocytes to prevent virus spread. Memory CD8<sup>+</sup> T cells have been  
292 reported effective in protecting susceptible mice from lethal orthopoxvirus  
293 challenges.<sup>34-36</sup> Since mRNA-A-LNP and mRNA-B-LNP primarily elicit  
294 memory CD8<sup>+</sup> T cells, allowing T cell-mediated lysis during the early infection  
295 period of viral challenge would prevent virus spread (Fig. 3d). Furthermore,  
296 circulating antibodies performed a similar role to CD8<sup>+</sup> T cells.<sup>34</sup> It is the long-  
297 lived plasma cells (LLPC) and memory B cells that are responsible for most of  
298 the prolonged humoral immunity induced by vaccines.<sup>37</sup> Memory B cells  
299 induced with the smallpox vaccine could respond quickly to infection and  
300 replenish LLPC to maintain long-term antibodies levels in humans, according  
301 to a study.<sup>38</sup> Moreover, memory B cells were also associated with IgM - IgG  
302 isotype switching. Therefore, considering that memory B cells are developed  
303 in the germinal center, the significant increase in MPXV-specific GC B cells

304 and Tfh cells suggests that mRNA-A-LNP and mRNA-B-LNP can maintain  
305 protective antibody responses with high affinity and durability (Fig. 3a-b).  
306 In summary, we report efficient and safe quadrivalent mRNA vaccine  
307 candidates against MPXV, based on MPXV-specific antigens A29L, A35R,  
308 M1R and B6R. The vaccines reported here are the first MPXV vaccines  
309 developed using an mRNA vaccine platform. As mRNA-A-LNP and mRNA-B-  
310 LNP induce solid humoral and cellular immunity, they could provide new ideas  
311 for orthopoxvirus vaccine development. Considering the rapidly spreading  
312 monkeypox epidemics, MPXV mRNA vaccines which can be rapidly  
313 developed and prepared on a large scale, are expected to protect against  
314 infection-related symptoms, hospitalizations, and death.

315

#### 316 **Materials and methods:**

#### 317 **Ethics statement**

318 All animal studies, there were reviewed and approved by the Animal  
319 Experiment Committee of Laboratory Animal Center, Academy of Military  
320 Medical Sciences (AMMS), China (Assurance Number: IACUC-DWZX-2022-  
321 576). All animal studies were conducted strictly in accordance with the  
322 guidelines set by the Chinese Regulations of Laboratory Animals and  
323 Laboratory Animal Requirements of Environment and Housing Facilities.

#### 324 **Cells and viruses**

325 HEK293T, Huh-7, RD, Vero and 143TK cells were cultured in Dulbecco's  
326 Modified Eagle Medium (DMEM; Thermo Fisher) supplemented with 10 %  
327 fetal bovine serum (FBS; Thermo Fisher) and penicillin (100 U/ml)-  
328 streptomycin (100 mg/ml) (Thermo Fisher). All cells were grown at 37 °C in a  
329 humidified 5% CO<sub>2</sub> atmosphere.

330 The vaccinia virus (VACV) Tian Tan strain expressing firefly luciferase was  
331 propagated in 143TK cells and titrated in Vero cells.<sup>23</sup>

### 332 **Synthesis and characterization of MPXV mRNA**

333 All mRNA sequences encoding MPXV proteins (A29L, A35R, M1R, B6R)  
334 were prepared by *in vitro* transcription, as described previously.<sup>22</sup>

335 Transcription was performed from linearized DNA templates using the T7-  
336 FlashScribe™ Transcription Kit (Cellscript). Further, the modified mRNA was  
337 synthesized by replacing UTP in the kit with pseudo-UTP (TriLink).

338 Afterwards, the RNA was capped using the ScriptCap™ Cap 1 Capping  
339 System kit with ScriptCap™ Capping enzyme and 2'-O-methyltransferase  
340 (Cellscript) according to the manufacturer's instructions. The mRNA product  
341 purified by ammonium acetate precipitation was then resuspended in RNase-  
342 free water for further analysis and application.

343 The concentration and quality of the synthesized MPXV mRNA were  
344 measured using an Agilent 2100 Bioanalyzer and RNA Nano 6000 Assay Kit  
345 (Agilent), according to the manufacturer's instructions.



346 All mRNAs (2 µg) were transfected into HEK293T cells using Lipofectamine  
347 3000 transfection reagent (Thermo Fisher) according to the manufacturer's  
348 instructions, lysates were collected, and Western blotting was performed.

#### 349 **Formulation and characterization of mRNA-LNP**

350 Lipid nanoparticle (LNP) formulations were prepared using NanoAssemblr  
351 Ignite's (Precision Nanosystems) NxGen Microfluidics technology. Briefly,  
352 lipids containing ionised lipids, 1, 2-distearoyl-sn-glycero-3-phosphocholine  
353 (DSPC), cholesterol and DMG-PEG2000 were dissolved in ethanol (with a  
354 molar ratio of 50:10:38.5:1.5). In an Ignite™ mixer, the lipid mixture was  
355 combined with 20 mM citrate buffer (pH 4.0) containing mRNA in a 1:3 volume  
356 ratio. It was then diluted through a 100 k MWCO PES membrane (Sartorius  
357 Stedim Biotech) against a 10-fold volume of DPBS (pH 7.4) and concentrated  
358 to the desired concentration.

359 The particle size and ζ-potential of mRNA-LNP were measured by a Litesizer  
360 500 (Anton Paar). Particle size measurements were carried out using dynamic  
361 light scattering (DLS). The data were also analyzed using the Anton Paar  
362 Kalliope software package.

363 The morphology of mRNA-LNP was analyzed by transmission electron  
364 microscopy (Hitachi H-7800, Tokyo) using a negative staining technique.  
365 mRNA-LNP was absorbed into the copper mesh for 60 s and stained with  
366 phosphotungstic acid (1%) for 20 s before observation.

367 The Quant-iT RiboGreen RNA Reagent and Kit were used to detect the  
368 encapsulation of mRNA-LNP according to the manufacturer's instructions.

### 369 **Mouse vaccination**

370 In this experiment, 15 BALB/c mice (6-8 weeks of age, female, SPF) were  
371 randomly divided into three groups (n = 5). The mice were immunized with the  
372 mRNA-A-LNP vaccine or the mRNA-B-LNP vaccine or were designated  
373 negative controls. We administered the vaccine intramuscularly at 40 µg on  
374 day 0. And a booster immunization was administered on day 14. All mice were  
375 tested for IgG and neutralizing antibodies on days 10 and 24 after the initial  
376 immunization. The following flow cytometry analyses were performed 30 days  
377 after the initial vaccination.

### 378 **Evaluation of serum antibody**

379 IgG antibody titers to MPXV-specific antigens A29L, A35R, M1R and B6R  
380 were determined by enzyme-linked immunosorbent assay (ELISA). VACV-  
381 specific neutralizing antibody titers were determined by a live-virus based  
382 neutralization test.

#### 383 (a) ELISA assay.

384 IgG antibody titers against MPXV-specific antigens A29L, A35R, M1R and  
385 B6R were determined by ELISA. A 96-well plate was coated with 1 µg/ml of  
386 A29L (TSP-MV002, Tsingke Biotechnology), A35R (TSP-MV003, Tsingke  
387 Biotechnology), M1R (TSP-MV005, Tsingke Biotechnology) or B6R (40902-  
388 V08H, Sino Biological) protein respectively and incubated overnight at 4°C.

389 After incubation, plates were washed with 1 x TBST and blocked with BSA for  
390 2 hours at 37 °C. Then, serial 2-fold gradient dilutions of serum starting at  
391 1:100 were added to the wells, diluted with casein block, and incubated for 1  
392 hour at 37 °C. Next, the plates were washed and treated with horseradish  
393 peroxidase (HRP)-conjugated goat anti-mouse IgG (Abclonal) for 1 hour at  
394 37 °C. Afterwards, the plates were washed and incubated with the substrate  
395 tetramethylbenzidine (TMB; TIANGEN) for 20 minutes at room temperature in  
396 the dark before the reaction was terminated with hydrochloric acid (2M;  
397 Solarbio). Absorbance at 450/630 nm was recorded using an I-control Infinite  
398 200 PRO microplate reader (TECAN). The ELISA endpoint titers were defined  
399 as the dilution of vaccinated serum, which resulted in absorbance no less than  
400 2.1-fold that of the average negative serum (1:100).

#### 401 (b) Live-virus neutralization assay

402 Neutralizing antibody titers were determined by a live-virus neutralization  
403 assay. The VACV Tian Tan strain was designed to encode firefly luciferase  
404 protein.<sup>39</sup> Sera were tested for neutralizing activity against the live virus via  
405 mixing serial 3-fold diluted sample, starting at 1:30, with  $4 \times 10^3$  TCID<sub>50</sub> of  
406 VACV. The serially diluted serum samples were mixed with the diluted virus in  
407 an equal volume. The antibody–virus and virus-only mixtures were then  
408 incubated at 37 °C with 5% CO<sub>2</sub>. After incubating for 1 hour, we added Vero  
409 cells (40,000 cells/well) to each well at 37 °C with 5% CO<sub>2</sub>. After 48-hour  
410 incubation, the cells were lysed, and the luciferase activity was measured via

411 Bright-Glo Luciferase Assay System (Promega) according to the  
412 manufacturer's specifications. Luciferase activity was then measured using an  
413 EnSight plate reader (PerkinElmer). Neutralizing activity was calculated by  
414 quantification of luciferase activity in relative light units (RLU). 50% live-virus  
415 neutralizing antibody titer (NT<sub>50</sub>) were calculated using a log (inhibitor) vs.  
416 normalized response (Variable slope) non-linear regression model in  
417 GraphPad Prism 8.0 (GraphPad Software).

#### 418 **Evaluation of cellular immune response**

419 Cells from spleen and DLNs were isolated and analyzed by flow cytometry to  
420 determine the cellular immune response. DLNs were used to analyze Tfh cells  
421 responses and GC B cells responses, Spleen was used to analyze CD4<sup>+</sup> or  
422 CD8<sup>+</sup> Tem cells responses.

423 Briefly, cells from spleen or DLNs (1,000,000 cells/well) were stimulated with  
424 MPXV-specific antigens A29L, A35R, M1R and B6R (2 µg/ml each protein) at  
425 37 °C in 5% CO<sub>2</sub> for 12 h. Brefeldin A (5 µg/ml; Biolegend) was incubated with  
426 cells for 4 h. Then, Fc receptors of cells were blocked using CD16/CD32  
427 antibodies (Mouse BD Fc Block; BD Biosciences) for 15 min at 4 °C, and cells  
428 were stained with a cocktail of fluorescently conjugated antibodies to CD3-  
429 PE/Cyanine7 (Biolegend), CD4-FITC (Biolegend), CD8-PercP (Biolegend),  
430 CD44-PE (Biolegend), CD62L-APC (Biolegend), B220-FITC (Biolegend),  
431 CD4-PercP/Cyanine5.5 (Biolegend), CD44-APC (Biolegend), PD-1-  
432 PE/Cyanine7 (Biolegend), B220-PercP/Cyanine5.5 (Biolegend), Fas-PE

433 (Biolegend) and GL7-FITC (Biolegend) for another 30 min at 4 °C in dark.  
434 Following washing with cell staining buffer (BD Biosciences), dead cells were  
435 stained with Fixable Viability Dye eFluor™ 780 (Thermo Fisher Scientific) for  
436 30 min at 4 °C in the dark. A final wash with cell staining buffer, data were  
437 obtained by FACS Aria II flow cytometer (BD Biosciences) and analyzed by  
438 Flow J software. The GC B cell response was represented as  
439 live<sup>+</sup>/B220<sup>+</sup>/Fas<sup>+</sup>/GL7<sup>+</sup>. The Tfh cell response was represented as live<sup>+</sup>/B220<sup>-</sup>  
440 /CD4<sup>+</sup>/CD44<sup>+</sup>/PD-1<sup>+</sup>/CXCR5<sup>+</sup>. The CD4<sup>+</sup> Tem cell response was represented  
441 as live<sup>+</sup>/CD3<sup>+</sup>/CD4<sup>+</sup>/CD44<sup>+</sup>/CD62L<sup>-</sup>. The CD8<sup>+</sup> Tem cell response was  
442 represented as live<sup>+</sup>/CD3<sup>+</sup>/CD8<sup>+</sup>/CD44<sup>+</sup>/CD62L<sup>-</sup>.

#### 443 **Serum protective test**

444 The VACV challenge model is based on the VACV Tian Tan strain expressing  
445 firefly luciferase. Using 4-week-old BALB/c nude mice, the serum passive  
446 protection model was developed. Protective sera were collected from BALB/c  
447 mice immunised with mRNA-A-LNP and mRNA-B-LNP. Serum samples were  
448 collected 24 days after the initial immunization. To assess *in vitro* sera  
449 protection, serum (13 µl) and virus (4 x 10<sup>3</sup> TCID<sub>50</sub>) were mixed for one hour  
450 before intravenous (i.v.) and intraperitoneal (i.p.) challenge of nude mice.  
451 To assess *in vivo* sera protection, serum (50 µl) was first injected  
452 intravenously into nude mice, followed one hour later by s.c. challenge with  
453 VACV (2.5 x 10<sup>5</sup> TCID<sub>50</sub>). Bioluminescent signal measurements were made  
454 following the viral challenge.

455 Bioluminescence imaging (BLI) was acquired and analyzed using the IVIS  
456 Lumina Series III imaging system (PerkinElmer). Briefly, luminescence was  
457 measured 5 minutes after intraperitoneal injection of the substrate D-luciferin  
458 (PerkinElmer). The bioluminescent signals in regions of interest (ROIs) were  
459 quantified using Living Image 3.5.

#### 460 **Mouse challenge**

461 The VACV challenge model is based on the VACV Tian Tan strain expressing  
462 firefly luciferase. BALB/c mice (n=5) immunized with mRNA-A-LNP and  
463 mRNA-B-LNP were challenged subcutaneously with VACV ( $4 \times 10^5$  TCID<sub>50</sub>)  
464 30 days after the initial immunization. At hour 24 post-challenge, mice were  
465 measured for bioluminescence signals.

#### 466 ***In vivo* toxicity**

467 To assess the *in vivo* toxicity of the vaccine, body weights were recorded after  
468 vaccination. Mice vaccinated with mRNA-A-LNP (40 µg; n = 3) were analyzed  
469 for heart, liver and kidney function 48 hours after immunisation using a  
470 Chemray 240 and Chemray 800 (Rayto) automated biochemical analyzer.  
471 Organ tissues, including heart, liver, spleen, lung and kidney, were extracted  
472 48 hours after injection for histopathology and fixed in 4% neutral buffered  
473 formaldehyde. Afterwards, they were embedded in paraffin, sectioned and  
474 stained with hematoxylin and eosin (H&E). Images were taken with a NIKON  
475 Eclipse CI microscope.

#### 476 **Statistical analysis**

477 Statistical analyses were performed using GraphPad Prism 8.0 (GraphPad  
478 Software). All of the data are presented as the mean  $\pm$  SEM. Statistical  
479 difference was analyzed by one-way or two-way ANOVA. All tests are  
480 accepted as statistically significant when the  $p$  value is less than 0.05.

481

## 482 REFERENCES

- 483 1. Likos, A.M. *et al.* A tale of two clades: monkeypox viruses. *J Gen Virol* **86**, 2661-2672  
484 (2005).
- 485 2. Isidro, J. *et al.* Addendum: Phylogenomic characterization and signs of microevolution in  
486 the 2022 multi-country outbreak of monkeypox virus. *Nat Med* **28**, 2220-2221 (2022).
- 487 3. Weaver, J.R. & Isaacs, S.N. Monkeypox virus and insights into its immunomodulatory  
488 proteins. *Immunol Rev* **225**, 96-113 (2008).
- 489 4. Otu, A., Ebenso, B., Walley, J., Barcelo, J.M. & Ochu, C.L. Global human monkeypox  
490 outbreak: atypical presentation demanding urgent public health action. *Lancet Microbe*  
491 **3**, e554-e555 (2022).
- 492 5. Lum, F.M. *et al.* Monkeypox: disease epidemiology, host immunity and clinical  
493 interventions. *Nat Rev Immunol* **22**, 597-613 (2022).
- 494 6. Petersen, B.W., Harms, T.J., Reynolds, M.G. & Harrison, L.H. Use of Vaccinia Virus  
495 Smallpox Vaccine in Laboratory and Health Care Personnel at Risk for Occupational  
496 Exposure to Orthopoxviruses - Recommendations of the Advisory Committee on  
497 Immunization Practices (ACIP), 2015. *MMWR Morb Mortal Wkly Rep* **65**, 257-262 (2016).
- 498 7. Ahmed, S.F., Sohail, M.S., Quadeer, A.A. & McKay, M.R. Vaccinia-Virus-Based Vaccines  
499 Are Expected to Elicit Highly Cross-Reactive Immunity to the 2022 Monkeypox Virus.  
500 *Viruses* **14** (2022).
- 501 8. Thornhill, J.P. *et al.* Monkeypox Virus Infection in Humans across 16 Countries - April-  
502 June 2022. *N Engl J Med* **387**, 679-691 (2022).
- 503 9. Rao, A.K. *et al.* Use of JYNNEOS (Smallpox and Monkeypox Vaccine, Live,  
504 Nonreplicating) for Preexposure Vaccination of Persons at Risk for Occupational  
505 Exposure to Orthopoxviruses: Recommendations of the Advisory Committee on  
506 Immunization Practices - United States, 2022. *MMWR Morb Mortal Wkly Rep* **71**, 734-  
507 742 (2022).
- 508 10. Lane, J.M. & Goldstein, J. Adverse events occurring after smallpox vaccination. *Semin*  
509 *Pediatr Infect Dis* **14**, 189-195 (2003).
- 510 11. McFadden, G. Poxvirus tropism. *Nat Rev Microbiol* **3**, 201-213 (2005).
- 511 12. Hooper, J.W. *et al.* Smallpox DNA vaccine protects nonhuman primates against lethal  
512 monkeypox. *J Virol* **78**, 4433-4443 (2004).
- 513 13. Ramirez, J.C., Tapia, E. & Esteban, M. Administration to mice of a monoclonal antibody  
514 that neutralizes the intracellular mature virus form of vaccinia virus limits virus replication

- 515 efficiently under prophylactic and therapeutic conditions. *J Gen Virol* **83**, 1059-1067  
516 (2002).
- 517 14. Hooper, J.W., Custer, D.M., Schmaljohn, C.S. & Schmaljohn, A.L. DNA vaccination with  
518 vaccinia virus L1R and A33R genes protects mice against a lethal poxvirus challenge.  
519 *Virology* **266**, 329-339 (2000).
- 520 15. Mucker, E.M. *et al.* A Nucleic Acid-Based Orthopoxvirus Vaccine Targeting the Vaccinia  
521 Virus L1, A27, B5, and A33 Proteins Protects Rabbits against Lethal Rabbitpox Virus  
522 Aerosol Challenge. *J Virol* **96**, e0150421 (2022).
- 523 16. Hooper, J.W., Custer, D.M. & Thompson, E. Four-gene-combination DNA vaccine  
524 protects mice against a lethal vaccinia virus challenge and elicits appropriate antibody  
525 responses in nonhuman primates. *Virology* **306**, 181-195 (2003).
- 526 17. Pardi, N. *et al.* Zika virus protection by a single low-dose nucleoside-modified mRNA  
527 vaccination. *Nature* **543**, 248-251 (2017).
- 528 18. Petsch, B. *et al.* Protective efficacy of in vitro synthesized, specific mRNA vaccines against  
529 influenza A virus infection. *Nat Biotechnol* **30**, 1210-1216 (2012).
- 530 19. Edghill-Smith, Y. *et al.* Smallpox vaccine-induced antibodies are necessary and sufficient  
531 for protection against monkeypox virus. *Nat Med* **11**, 740-747 (2005).
- 532 20. Lederer, K. *et al.* SARS-CoV-2 mRNA Vaccines Foster Potent Antigen-Specific Germinal  
533 Center Responses Associated with Neutralizing Antibody Generation. *Immunity* **53**,  
534 1281-1295 e1285 (2020).
- 535 21. Crotty, S. T Follicular Helper Cell Biology: A Decade of Discovery and Diseases. *Immunity*  
536 **50**, 1132-1148 (2019).
- 537 22. Sang, Y. *et al.* An mRNA vaccine with broad-spectrum neutralizing protection against  
538 Omicron variant sublineages BA.4/5 -included SARS-CoV-2. *Signal Transduct Target*  
539 *Ther* **7**, 362 (2022).
- 540 23. Wu, J. *et al.* Screening and evaluation of potential inhibitors against vaccinia virus from  
541 767 approved drugs. *J Med Virol* **91**, 2016-2024 (2019).
- 542 24. Zhang, L. *et al.* A bioluminescent imaging mouse model for Marburg virus based on a  
543 pseudovirus system. *Hum Vaccin Immunother* **13**, 1811-1817 (2017).
- 544 25. Fogg, C. *et al.* Protective immunity to vaccinia virus induced by vaccination with multiple  
545 recombinant outer membrane proteins of intracellular and extracellular virions. *J Virol*  
546 **78**, 10230-10237 (2004).
- 547 26. Golden, J.W. *et al.* Polyclonal antibody cocktails generated using DNA vaccine  
548 technology protect in murine models of orthopoxvirus disease. *Virol J* **8**, 441 (2011).
- 549 27. Galmiche, M.C., Goenaga, J., Wittek, R. & Rindisbacher, L. Neutralizing and protective  
550 antibodies directed against vaccinia virus envelope antigens. *Virology* **254**, 71-80 (1999).
- 551 28. Sakhatskyy, P., Wang, S., Chou, T.H. & Lu, S. Immunogenicity and protection efficacy of  
552 monovalent and polyvalent poxvirus vaccines that include the D8 antigen. *Virology* **355**,  
553 164-174 (2006).
- 554 29. Turner, J.S. *et al.* SARS-CoV-2 mRNA vaccines induce persistent human germinal centre  
555 responses. *Nature* **596**, 109-113 (2021).
- 556 30. Stittelaar, K.J. *et al.* Modified vaccinia virus Ankara protects macaques against respiratory  
557 challenge with monkeypox virus. *J Virol* **79**, 7845-7851 (2005).
- 558 31. Golden, J.W. *et al.* Side-by-side comparison of gene-based smallpox vaccine with MVA



- 559 in nonhuman primates. *PLoS One* **7**, e42353 (2012).
- 560 32. Rubins, K.H. *et al.* The host response to smallpox: analysis of the gene expression  
561 program in peripheral blood cells in a nonhuman primate model. *Proc Natl Acad Sci U S*  
562 *A* **101**, 15190–15195 (2004).
- 563 33. Zaucha, G.M., Jahrling, P.B., Geisbert, T.W., Swearingen, J.R. & Hensley, L. The pathology  
564 of experimental aerosolized monkeypox virus infection in cynomolgus monkeys (*Macaca*  
565 *fascicularis*). *Lab Invest* **81**, 1581–1600 (2001).
- 566 34. Hickman, H.D. *et al.* Anatomically restricted synergistic antiviral activities of innate and  
567 adaptive immune cells in the skin. *Cell Host Microbe* **13**, 155–168 (2013).
- 568 35. Remakus, S., Rubio, D., Ma, X., Sette, A. & Sigal, L.J. Memory CD8+ T cells specific for a  
569 single immunodominant or subdominant determinant induced by peptide-dendritic cell  
570 immunization protect from an acute lethal viral disease. *J Virol* **86**, 9748–9759 (2012).
- 571 36. Xu, R.H., Fang, M., Klein-Szanto, A. & Sigal, L.J. Memory CD8+ T cells are gatekeepers of  
572 the lymph node draining the site of viral infection. *Proc Natl Acad Sci U S A* **104**, 10992–  
573 10997 (2007).
- 574 37. Crotty, S. & Ahmed, R. Immunological memory in humans. *Semin Immunol* **16**, 197–203  
575 (2004).
- 576 38. Crotty, S. *et al.* Cutting edge: long-term B cell memory in humans after smallpox  
577 vaccination. *J Immunol* **171**, 4969–4973 (2003).
- 578 39. Liu, Q. *et al.* A novel high-throughput vaccinia virus neutralization assay and preexisting  
579 immunity in populations from different geographic regions in China. *PLoS One* **7**,  
580 e33392 (2012).

581

## 582 **ACKNOWLEDGEMENTS**

583 The study was supported by the National Key R&D Program of China  
584 (2021YFC2302405) and the National Natural Science Foundation of China  
585 (Grant No. 81830101).

586

## 587 **AUTHOR CONTRIBUTIONS**

588 JY and SW conceived the project. YS and ZZ synthesized the mRNA vaccine  
589 and performed the experiments. FL, YW and WH performed animal challenge  
590 experiments. HL, CY, HS, JL, YC, JM, XW, and JF provided experimental  
591 support. JY designed the MPXV mRNA sequence. YS, ZZ and JY analyzed all

592 the data and wrote the manuscript. JY and SW edited and revised the  
593 manuscript. All authors read and approved the final version of the manuscript.

594

595 **COMPETING INTERESTS**

596 The authors declare no competing interests.

597

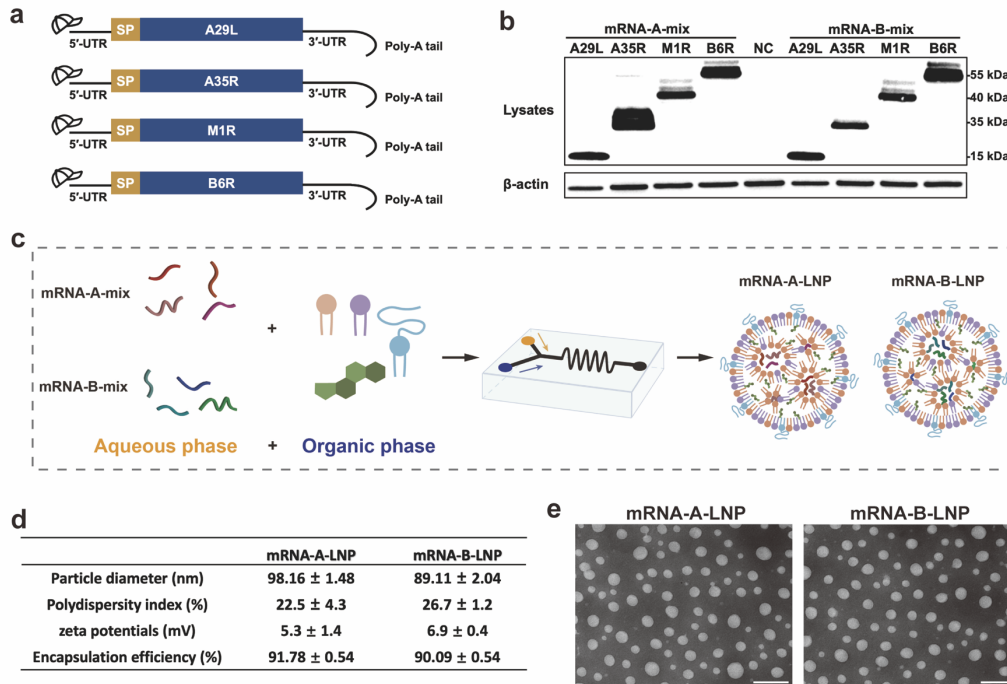

598

599 **Figure 1. Design and encapsulation of mRNA-A-LNP and mRNA-B-LNP**

600 (a) The mRNA construct expressing the MPXV-specific antigen A29L, A35R,

601 M1R, B6R. (b) The MPXV-specific antigen A29L, A35R, M1R and B6R was

602 expressed by mRNA in HEK293T cells. Cells were transfected with four

603 mRNAs (1 µg/mL) each from mRNA-A-mix and mRNA-B-mix for 20 hours

604 using Lipofectamine 3000 transfection reagent. (c) Preparation mechanism of

605 mRNA-A-LNP and mRNA-B-LNP. Briefly, the four mRNAs were mixed in an

606 acidic aqueous solution, then injected with organic phase lipids, and the

607 mixture was extruded through a microfluidic chip. (d) The physicochemical

608 parameters of mRNA-A-LNP and mRNA-B-LNP. Data are shown as mean ±

609 SEM. (e) A representative transmission electronic microscopic (TEM) image

610 presented the morphology of mRNA-A-LNP and mRNA-B-LNP. Scale bar =

611 200 nm.



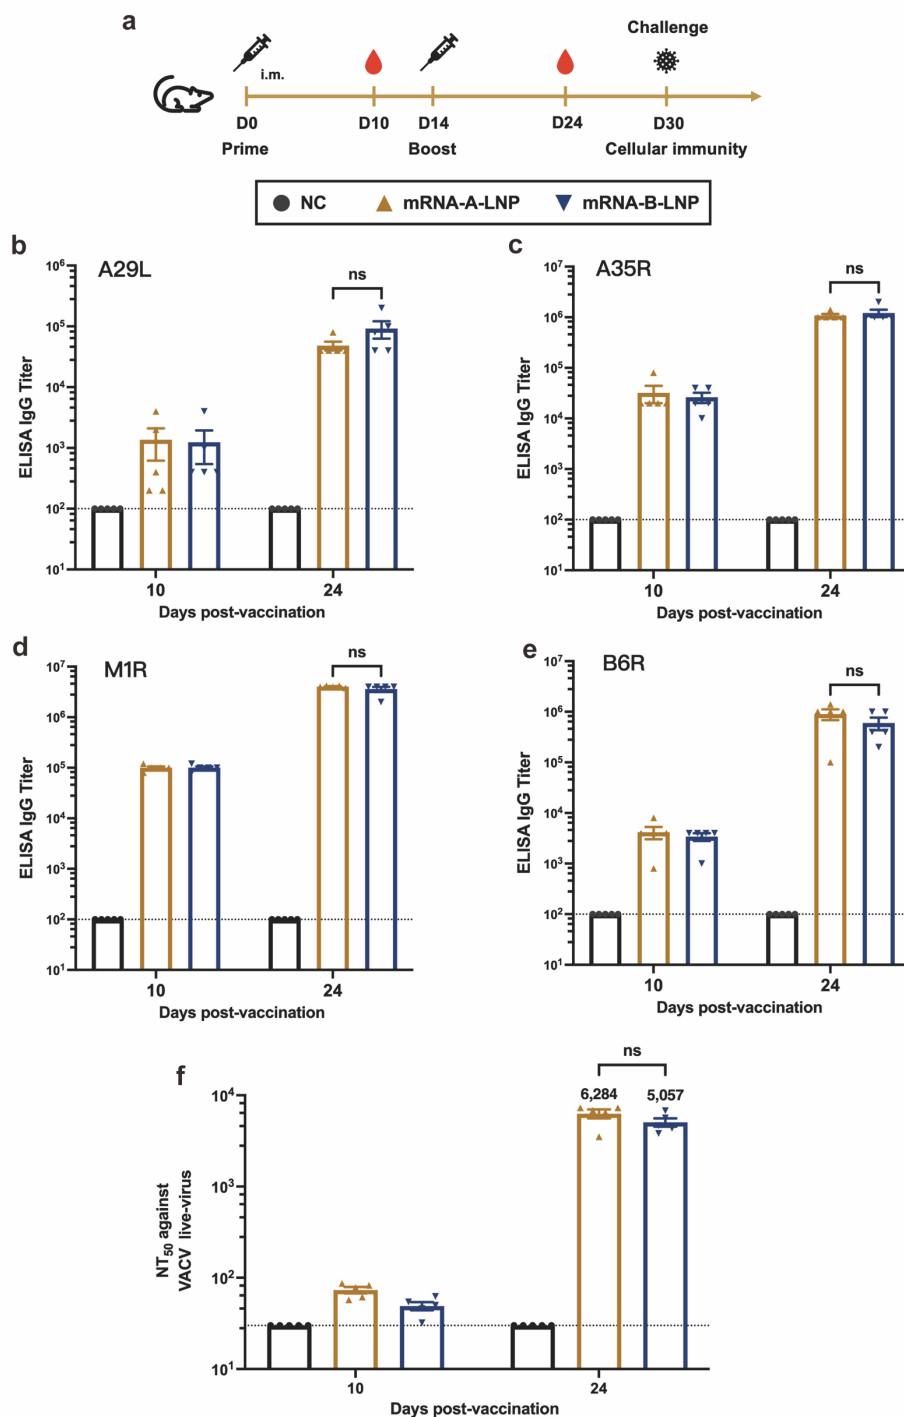

613

614 **Figure 2. Humoral Immune Response in mRNA-A-LNP and mRNA-B-**  
 615 **LNP-Vaccinated Mice**

616 Female BALB/c mice were immunized with 40  $\mu$ g mRNA-A-LNP vaccine (n =

617 5) or 40  $\mu$ g mRNA-B-LNP vaccine (n = 5) or were designated negative

618 controls (n = 5). Two intramuscular immunizations were on day 0 and day 14,  
619 respectively. Serum was collected 10 and 24 days after the initial vaccination.  
620 (a) Schematic diagram of immunization, sample collection, and challenge  
621 schedule. (b-e) The MPXV-specific antigen A29L, A35R, M1R and B6R IgG  
622 antibody titer was determined by ELISA. (f) The NT50 was determined by  
623 neutralizing antibody assay based on live VACV. The dashed line indicates  
624 the limit of detection of the assay. Data are shown as mean  $\pm$  SEM.  
625 Significance was calculated using two-way ANOVA with multiple comparison  
626 tests (n.s., not significant; \*\*p < 0.01).  
627

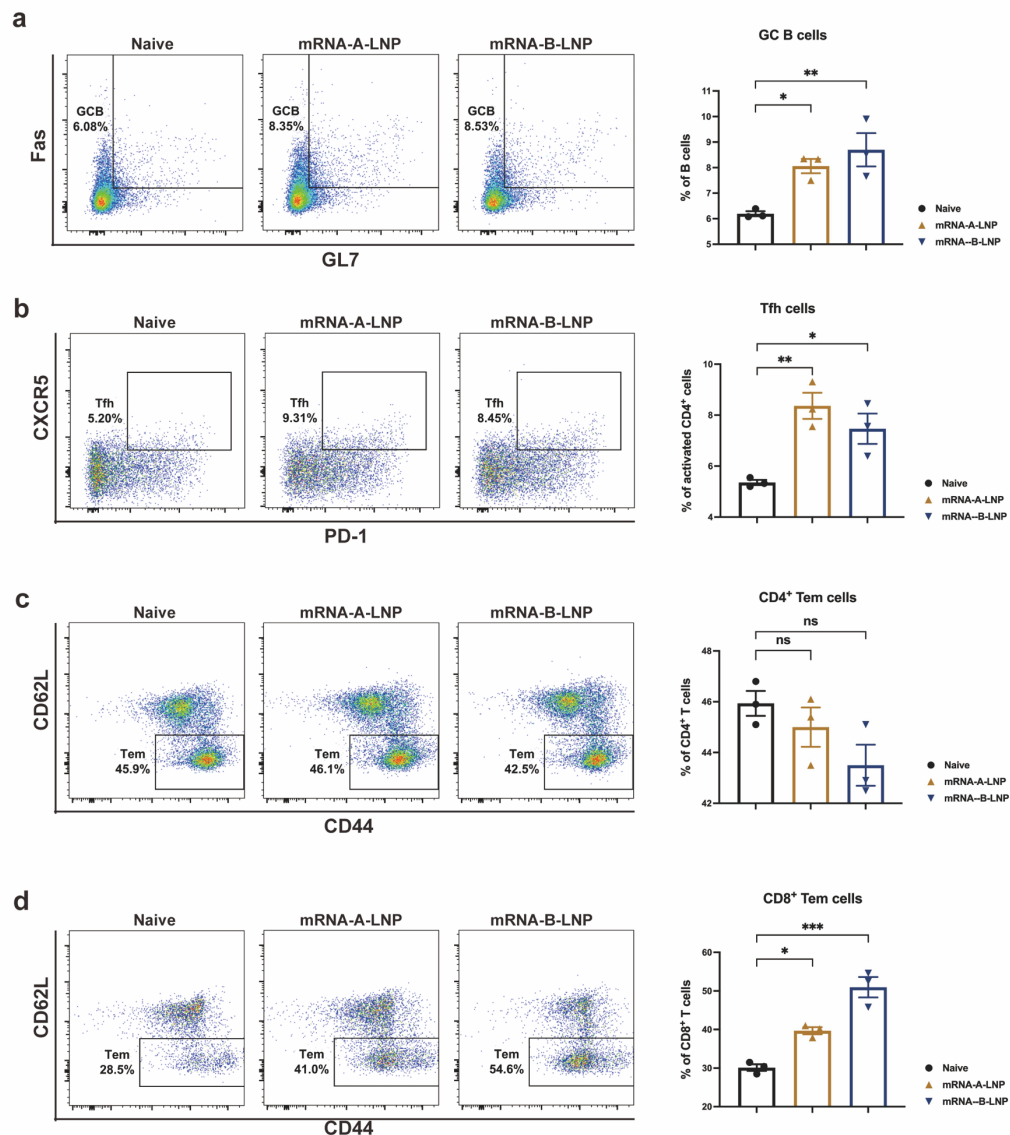

628

629 **Figure 3. MPXV-Specific Cell Immune Response in mRNA-A-LNP and**  
 630 **mRNA-B-LNP-Vaccinated Mice**

631 (a-b) MPXV-specific GC B cells (a) and Tfh cells (b) in DLNs were detected by

632 flow cytometry. (c-d) MPXV-specific CD4<sup>+</sup> (c) and CD8<sup>+</sup> (d) Tem cells in

633 spleen were detected by flow cytometry. Data are shown as mean ± SEM.

634 Significance was calculated using one-way ANOVA with multiple comparison

635 tests (n.s., not significant; \*p < 0.05, \*\*p < 0.01, \*\*\*p < 0.001).

636

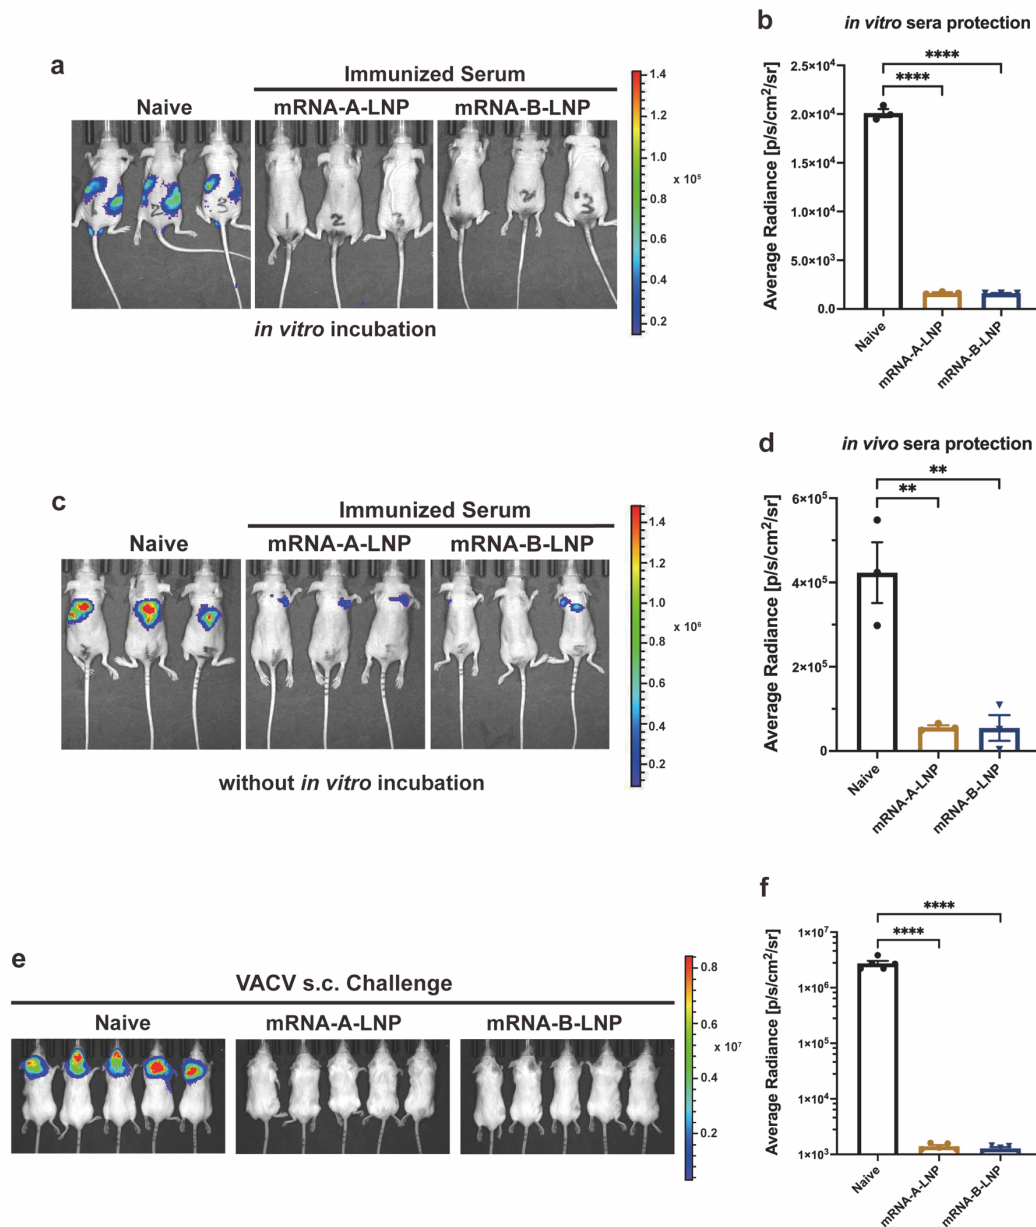

637

638 **Figure 4. Protection of mRNA-A-LNP and mRNA-B-LNP against VACV**

639 **Challenge in Mice.**

640 (a-b) *In vitro* serum protection. Serum (13  $\mu$ l) and virus ( $4 \times 10^3$  TCID<sub>50</sub>) were

641 mixed for one hour before the i.v. and i.p. challenges of the 4-week-old nude

642 mice (n = 3). Bioluminescent signal measurements were taken 6 hours after

643 the viral challenge. (c-d) *In vivo* serum protection. Serum (50  $\mu$ l) was first

644 injected intravenously into the 4-week-old nude mice (n = 3), followed one



645 hour later by s.c. challenge with VACV ( $2.5 \times 10^5$  TCID<sub>50</sub>). Bioluminescent  
646 signal measurements were taken 24 hours after the viral challenge. (e-f) Thirty  
647 days after initial immunization, mice (n=5) were s.c. challenged with VACV ( $4$   
648  $\times 10^5$  TCID<sub>50</sub>). The viral load of mice was measured by bioluminescence  
649 imaging, and the bioluminescence signal of mice was measured 24 hours  
650 after the challenge. Data are shown as mean  $\pm$  SEM. Significance was  
651 calculated using one-way ANOVA with multiple comparison tests (\*\*p < 0.01,  
652 \*\*\*\*p < 0.0001).

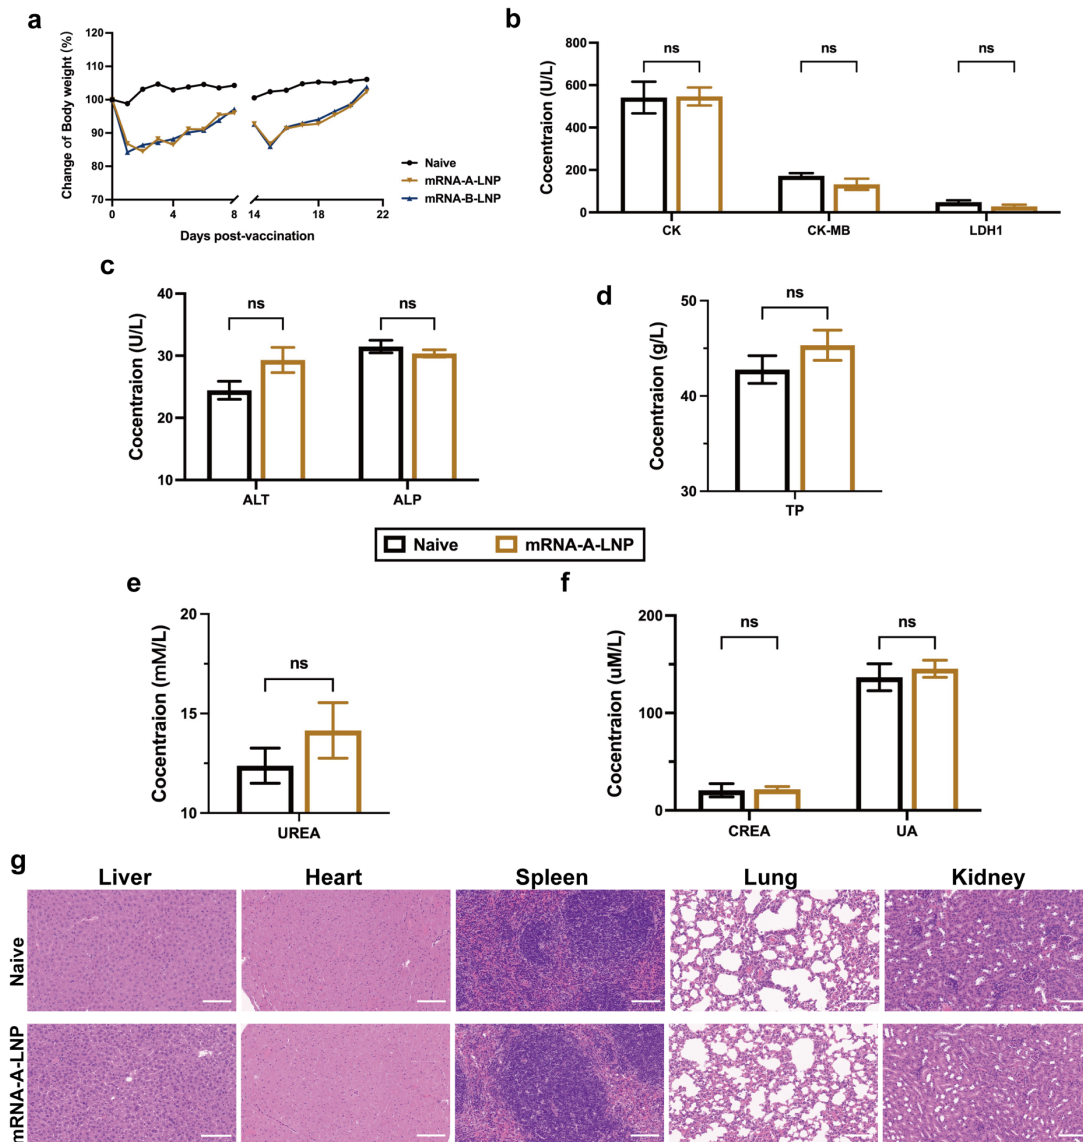

653

654 **Figure 5. The safety evaluation of MPXV quadrivalent mRNA vaccine in**  
655 **mice.**

656 (a) The body weight records of mice on the first eight days after each  
657 vaccination. (b-f) Heart, liver and kidney function were determined by blood  
658 biochemical parameters (n = 5). CK, CK-MB and LDH1 represent heart  
659 function (b), ALT, ALP and TP represent liver function (c-d), while UREA,  
660 CREA and UA represent kidney function (e-f). (g) Representative  
661 histopathology (H&E) of different tissues, heart, liver, spleen, lung and kidney

662 from naive mice or mRNA-A-LNP-immune mice. The H&E stained sections  
663 shown in the data are representative results from three test mice 48 hours  
664 post-inoculation. Scale bar = 100  $\mu$ m, 30  $\times$ . Data are shown as mean  $\pm$  SEM.  
665 Significance was calculated using two-way ANOVA with multiple comparison  
666 tests (n.s., not significant; \*p < 0.05, \*\*p < 0.01).  
667
